# Supplementary material for: Virtual reality in medical students’ education: a scoping review protocol
Source: PubMed Central journal article supplement — BMJ Open. 2021 May 26;11(5):e046986. doi: 10.1136/bmjopen-2020-046986 (PMC8160201; doi:10.1136/bmjopen-2020-046986), 2021-05-26
Supplement: bmjopen-2020-046986supp001.pdf [file bmjopen-2020-046986supp001.pdf]

## **Appendices**

### **Appendix I: Search strategy for MEDLINE**

1. exp Virtual Reality/
2. User-computer interface/
3. Computer Simulation/
4. Computer-Assisted Instruction/
5. ((simulat\* or virtual realit\* or virtual reality simulat\* or virtual reality environment\* or VRE or three-dimension\* or 3D or immersive virtual realit\* or immersive VR or HMD\* or head-mounted display\* or virtual world\* or avatar\* or virtual patient\* or VR room\*).mp.
6. 1 or 2 or 3 or 4 or 5
7. exp Education, Medical, Undergraduate/
8. Educational technology/
9. Clinical competence/
10. Educational measurement/
11. Problem-Based Learning/
12. Simulation Training/
13. Education/
14. Teaching/
15. Learning/
16. Curriculum/
17. (educat\* or learn\* or train\* or instruct\* or teach\*).mp.
18. 7 or 8 or 9 or 10 or 11 or 12 or 13 or 14 or 15 or 16 or 17
19. exp Students, Medical/
20. (medical student\* or medical undergraduate\* or pre-registrat\*).mp.

21. 19 or 20
22. 6 and 18 and 21
23. limit 22 to yr="2010 -Current"
24. limit 23 to english language

**Appendix II: Data extraction form**

| Category                                                 | Type of Data                                                                                                                                                                                                                                                                                                      |
|----------------------------------------------------------|-------------------------------------------------------------------------------------------------------------------------------------------------------------------------------------------------------------------------------------------------------------------------------------------------------------------|
| <b>1. Bibliographic information</b>                      | <b>a. Author</b><br><b>b. Year of publication</b><br><b>c. Country of study</b> <ul style="list-style-type: none"> <li>i) Region</li> <li>ii) WHO Income level</li> </ul> <b>d. Aims of study</b>                                                                                                                 |
| <b>2. Information relating to the inclusion criteria</b> | <b>a. Population</b> <ul style="list-style-type: none"> <li>i) Number of students</li> <li>ii) Year of study</li> </ul> <b>b. Setting</b>                                                                                                                                                                         |
| <b>3. Information relating to the study</b>              | <b>a. Type of VR</b> <ul style="list-style-type: none"> <li>i) 3D VR</li> <li>ii) VRE</li> <li>iii) VR with head-mounted display</li> <li>iv) VR simulators</li> </ul> <b>b. VR mode</b><br><b>c. Equipment used</b> <ul style="list-style-type: none"> <li>i) Input device</li> <li>ii) Output device</li> </ul> |

|  |                                                                                                                                                                                                                                                                                                                           |
|--|---------------------------------------------------------------------------------------------------------------------------------------------------------------------------------------------------------------------------------------------------------------------------------------------------------------------------|
|  | <ul style="list-style-type: none"><li><b>d. Subject taught</b></li><li><b>e. Revised subject</b></li><li><b>f. Duration of use of VR</b></li><li><b>g. Frequency of use of VR</b></li><li><b>h. Individual / group delivery</b></li><li><b>i. Extent of Immersion</b></li><li><b>j. Extent of Interactivity</b></li></ul> |
|--|---------------------------------------------------------------------------------------------------------------------------------------------------------------------------------------------------------------------------------------------------------------------------------------------------------------------------|
